# Supplementary material for: Emission-photoactivity cross-processing of mesoporous interfacial charge transfer in Eu3+ doped titania
Source: Royal Society of Chemistry journal article supplement (doi:10.1039/c0cp02509g), 2011-01-01
Supplement: c0cp02509g.pdf [file c0cp02509g.pdf]

## Supporting information

*RBS spectra of 1%Eu<sup>3+</sup> doped mesoporous TiO<sub>2</sub> after silver deposition. Spectra obtained with a 2.0 MeV He<sup>+</sup> beam, 45° tilt angle and 180°scattering angle (: fit ; data)*

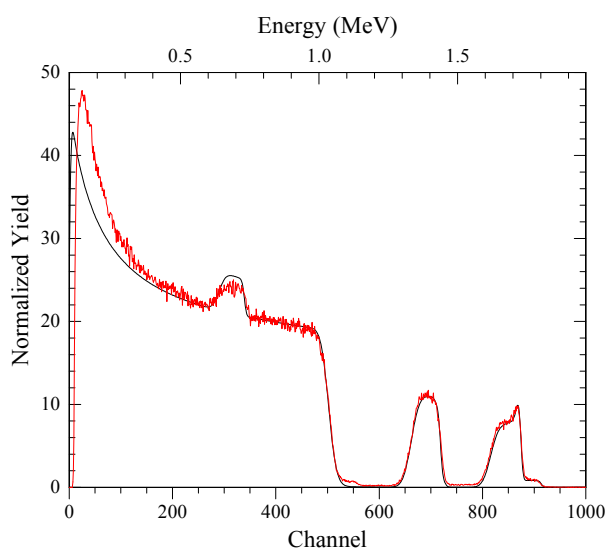

RBS show an homogeneous distribution of silver nanoparticles on the whole thickness of the film. The concentration values that give the best fit to the experimental data were 0.06 at % Ag, Ti, O. All values agree within experimental error with the nominal composition of the solution. The concentration of silver is slightly more important at the surface of the film.
